1 **Disrupting different *Distal-less* exons leads to ectopic and missing eyespots accurately modeled by**  
2 **reaction-diffusion mechanisms**

3  
4 Heidi Connahs<sup>1,5,\*</sup>, Sham Tlili<sup>2,5,\*</sup>, Jelle van Creijl<sup>1</sup>, Tricia Y. J. Loo<sup>1</sup>, Tirtha Banerjee<sup>1</sup>, Timothy E.  
5 Saunders<sup>1,2,3,\*</sup> and Antónia Monteiro<sup>1,4,\*</sup>  
6

7 <sup>1</sup>Department of Biological Sciences, National University of Singapore, Singapore

8 <sup>2</sup>Mechanobiology Institute, National University of Singapore, Singapore

9 <sup>3</sup>Institute of Molecular and Cell Biology, A\*Star, Proteos, Singapore

10 <sup>4</sup>Yale-NUS College, Singapore

11 <sup>5</sup>co-first authors

12 \*corresponding authors  
13

14 **Abstract**

15  
16 Eyespots on the wings of nymphalid butterflies represent colorful examples of the process of pattern  
17 formation, yet the developmental origins and the mechanisms behind eyespot differentiation are still  
18 not fully understood. Here we re-examine the function of *Distal-less* (*Dll*) in eyespot development,  
19 which is still unclear. We show that CRISPR-Cas9 induced exon 2 mutations in *Bicyclus anynana* leads  
20 to exon skipping and ectopic eyespots on the wing. Exon 3 mutations, however, lead to null/missense  
21 transcripts, missing eyespots, lighter wing coloration, loss of scales, and a variety of other phenotypes  
22 implicating *Dll* in the process of eyespot differentiation. Reaction-diffusion modeling enabled  
23 exploration of the function of *Dll* in eyespot formation, and accurately replicated a wide-range of  
24 mutant phenotypes. These results confirm that *Dll* is a required activator of eyespot development, scale  
25 growth and melanization and point to a new mechanism of alternative splicing to achieve *Dll* over-  
26 expression phenotypes.  
27

28 The genetic and developmental origins of the bullseye color patterns on the wings of nymphalid  
29 butterflies are still poorly understood. Eyespots originated once in ancestors of this butterfly lineage,  
30 around 90 million years ago<sup>1-3</sup>, to most likely function as targets for deflecting predators away from  
31 the butterfly's vulnerable body<sup>1,4,5</sup>. Eyespots may have originated via the co-option of a network of  
32 pre-wired genes because several of the genes associated with eyespots gained their novel expression  
33 domain concurrently with the origin of eyespots<sup>3</sup>. Some of these genes have since lost their expression  
34 in eyespots, without affecting eyespot development, suggesting that they did not play a functional role  
35 in eyespot development from the very beginning<sup>3</sup>. Yet, one of the genes, *Distal-less* (*Dll*), has remained  
36 associated with eyespots in most nymphalid species examined so far, suggesting that it may have played  
37 a functional role in eyespot origins<sup>3,6</sup>.  
38

39 The function of *Dll* in eyespot development was initially investigated in *B. anynana* using transgenic  
40 over-expression, RNAi, and ectopic expression tools<sup>7</sup>. Overexpressing *Dll* in *B. anynana* led to the  
41 appearance of small additional eyespots on the wing as well as larger eyespots, whereas *Dll* down-  
42 regulation produced smaller eyespots, strongly implicating *Dll* as an activator of eyespot development  
43<sup>7</sup>. However, a recent study using CRISPR-Cas9 to knock-out *Dll* function in the painted lady butterfly,  
44 *Vanessa cardui* contradicted these findings. Zhang and Reed (2016)<sup>8</sup> found that using two guides to  
45 disrupt exon 2 in *Dll* led to the appearance not only of distally extended eyespots but also of ectopic  
46 eyespots developing in novel locations on the wing. These observations led to a conclusion that *Dll*  
47 represses eyespot development. In addition, these researchers also showed that targeting the same  
48 exon in another butterfly, *Junonia coenia*, produced darker wing pigmentation, whereas the exact same  
49 phenotype was obtained via ectopic expression of *Dll* in the wings of *B. anynana*<sup>7</sup> and in the wings of  
50 *J. orythia*, a close relative of *J. coenia*<sup>9</sup>. One possibility for the discrepancies seen across species is that  
51 *Dll* has precisely opposite functions in the different butterfly species. Another possibility, which we  
52 believed more likely, is that the outcomes of genome editing may depend on the particular site that is  
53 targeted in the genome to disrupt the gene's function.  
54

55 In order to clarify the function of *Dll* in *B. anynana*, we separately targeted both exon 2 (using single  
56 guide RNAs Sg1 and Sg2) and exon 3 (using Sg3), within the homeobox (Fig. 1a). While screening

57 potential mutants we paid special attention to areas where *Dll* expression was previously detected in  
58 *B. anynana*. These areas included the antennae, thoracic, and abdominal legs<sup>10,11</sup> eyespot centers<sup>12,13</sup>  
59 eyespot black discs<sup>13,14</sup> and the wing margin<sup>12</sup> (Fig. 1b,c,d). We predicted that targeting different exons  
60 in *B. anynana* would lead to different phenotypes.

61

62 We complemented this approach with theoretical analysis of eyespot patterning. Reaction-diffusion  
63 approaches have successfully been used to model the differentiation of eyespot centers<sup>15,16</sup> however,  
64 the components of these models have not been mapped to specific molecules nor have the models  
65 been tested under controlled experimental perturbation, e.g. by altering the local distribution of some  
66 of the required components. Our reaction-diffusion modeling enabled us to integrate the spatial  
67 information from morphogenetic inputs and the role of *Dll* in eyespot shape and positioning.

68

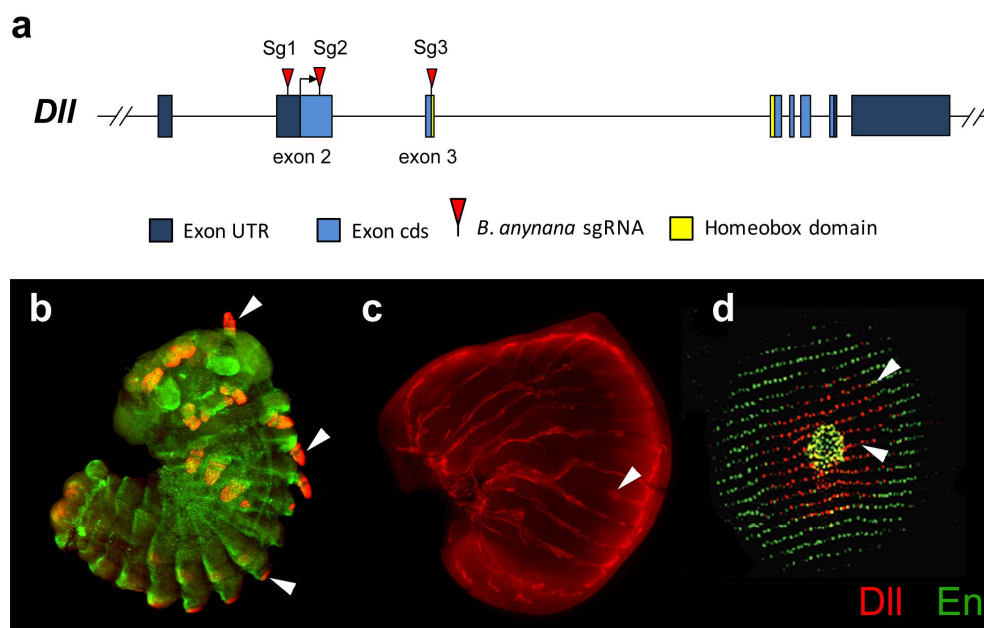

69

70

71 **Figure 1 | Expression of Distal-less in embryos, larval and pupal wings.** (a) *Dll* gene structure indicating  
72 the exons targeted by guide-RNAs in this work (red triangles). (b) *Dll* (red) is expressed in antennae,  
73 thoracic legs, and abdominal prolegs of embryos (arrowheads). Engrailed (*En*, green) is also expressed  
74 in embryos. (c) *Dll* is expressed in eyespot centers (arrowhead) and along the wing margin in late larval  
75 wings. (d) *Dll* is expressed in eyespot centers (arrowhead) and in black scale cells of pupal wings. *En* is  
76 expressed in the eyespot center and area of the gold ring.

77

78

79

80

81

82

83

84

85

86

87

88

89

90

## 91 Results

92 To confirm guide RNA efficiency *in vitro* we purified genomic amplicons of *Dll*, containing either exon 2  
93 or exon 3, and treated them with the respective guide RNAs and with Cas9 protein. The resulting  
94 products, when run on a gel, showed two bands of the predicted sizes for Sg1 and Sg3 and a faint band  
95 for Sg2 (Supplementary Fig. 1) confirming that the CRISPR-Cas9 system was introducing double-strand  
96 breaks in the targeted sequences.

### 97 ***Dll* exon 3 mutants produced loss of function phenotypes**

98 Embryonic injections of Sg3 targeting the *Dll* homeobox sequence on exon 3 (Fig. 1a; Table 1) led to a  
99 variety of adult phenotypes (Fig. 2, Table 2). The most striking mutants displayed complete loss of  
100 eyespots (Fig. 2a,b) followed by eyespots with significant developmental perturbations. Altered or  
101 lighter scale pigmentation, associated with the eyespot mutations, appeared to correspond to the  
102 extent of the mutant clones. Depending on their location, the lighter patches of wing tissue (i.e., the  
103 presumptive *Dll* null clones) had remarkable effects on pattern formation. Eyespots vanished when  
104 mutant patches covered the location of the eyespot centers (Fig. 2a,b), and mutant patches led to split  
105 eyespots with mutant tissue bisecting the two eyespot centers (Fig. 2c). Some patches also had lighter  
106 grey-blue scale pigmentation (Fig. 2d), lacked cover scales, or both cover and ground scales (Fig. 2e). In  
107 addition to wing mutations we observed appendage defects that would be expected from a *Dll*  
108 knockout<sup>17,18</sup>. A number of mutants exhibited reduced to barely noticeable stumps, legs with missing  
109 tarsi (Supplementary Fig. 2a) and deformed antennae with missing tips (Supplementary Fig. 2b).

110

### 111 ***Dll* exon 2 mutants produced gain and loss of function phenotypes**

112 Embryonic injections of guide RNAs targeting either the 5'UTR (Sg1) or the coding sequence (Sg2) of  
113 exon 2 led to phenotypes similar to the ones described above (Table 2) as well as to a remarkable new  
114 set of phenotypes, sometimes co-occurring on the same wing. These included ectopic eyespots along  
115 the proximal-distal axis of the wing (Fig. 2f) and eyespots with a tear-drop shaped center (Fig. 2g),  
116 closely resembling a spontaneous mutant variant in *B. anynana* known as the comet phenotype<sup>19</sup> (Fig.  
117 2h). Ectopic eyespots were observed regardless of whether we targeted the 5'UTR or the coding  
118 sequence of exon 2, as we injected each of these guide RNAs separately. Some butterflies displayed  
119 both ectopic and missing eyespots on the same wing (Fig. 2i). Interestingly, ectopic eyespots were never  
120 associated with changes in pigmentation in contrast to wing tissue with missing eyespots (Fig. 2i,j),  
121 which always displayed the grey-blue pigmentation defects, highlighting the extent of the mutant clone  
122 of cells. Similarly to exon 3 mutants, we also observed appendage mutants including truncated antenna  
123 and legs or with fusion of antenna or proximal leg segments (Supplementary Fig. 2c,d,e).

124

### 125 **Confirmation of CRISPR-Ca9 activity using next generation sequencing**

126 In order to confirm that the phenotypes observed were due to genetic alterations of the targeted exons,  
127 we performed next-generation amplicon sequencing of *Dll* to identify the entire range of mutations  
128 generated from Sg1, representing exon 2 mutations, and Sg3, representing exon 3 mutations. To  
129 identify mutations associated with each specific phenotype, especially in the case of exon 2 mutations  
130 that produced both ectopic as well as missing eyespots, we isolated DNA from the adult wing tissue by  
131 carefully dissecting around regions corresponding to missing, ectopic, or comet eyespots (see Fig 2f,g,i).  
132 To characterize mutations we used CRISPResso, a software pipeline for analyzing next generation  
133 sequencing data generated from CRISPR-Cas9 experiments<sup>20</sup>. This analysis identified a range of  
134 mutations from each wing tissue including deletions and insertions (Supplementary Figs 3, 4 and  
135 Supplementary Table 1); the most dominant mutations are shown in Figure 2k. The majority of  
136 mutations in exon 3 were comprised of frame-shift deletions whereas mutations induced by Sg1 were  
137 mostly non-coding (Table 2). For Sg3, we sequenced two individuals (Fig. 2c,d) and identified a range of  
138 mutations with the most frequent representing a 42 bp and 4 bp deletion, respectively (Fig. 2k and  
139 Supplementary Fig. 3a). For Sg1 we sequenced 3 individuals (Fig. 2f,g,i). A large 72bp deletion was  
140 observed in a mutant displaying ectopic eyespots (Fig. 2f, Supplementary Fig. 3b). In contrast, relatively  
141 small indels were observed for another ectopic eyespot mutant (Fig. 2i,k, Supplementary Fig. 3c), and  
142 surprisingly, the same 7 bp insertion emerged as the most dominant mutation from wing tissue either  
143 with ectopic or missing eyespots (Fig. 2i,k). The most dominant mutation observed for the comet  
144 eyespot phenotype represented a single base pair deletion (Fig. 2g,k, Supplementary Fig. 3b). Overall,  
145 CRISPResso identified only a very small proportion of mutations as disruptions to potential splice sites



146 (0.1- 0.2%). Because the link between specific mutations and the observed phenotypes was not clear,  
 147 we decided to explore whether perhaps mutations that targeted each of the exons led to modifications  
 148 in the way that *Dll* was transcribed.

149

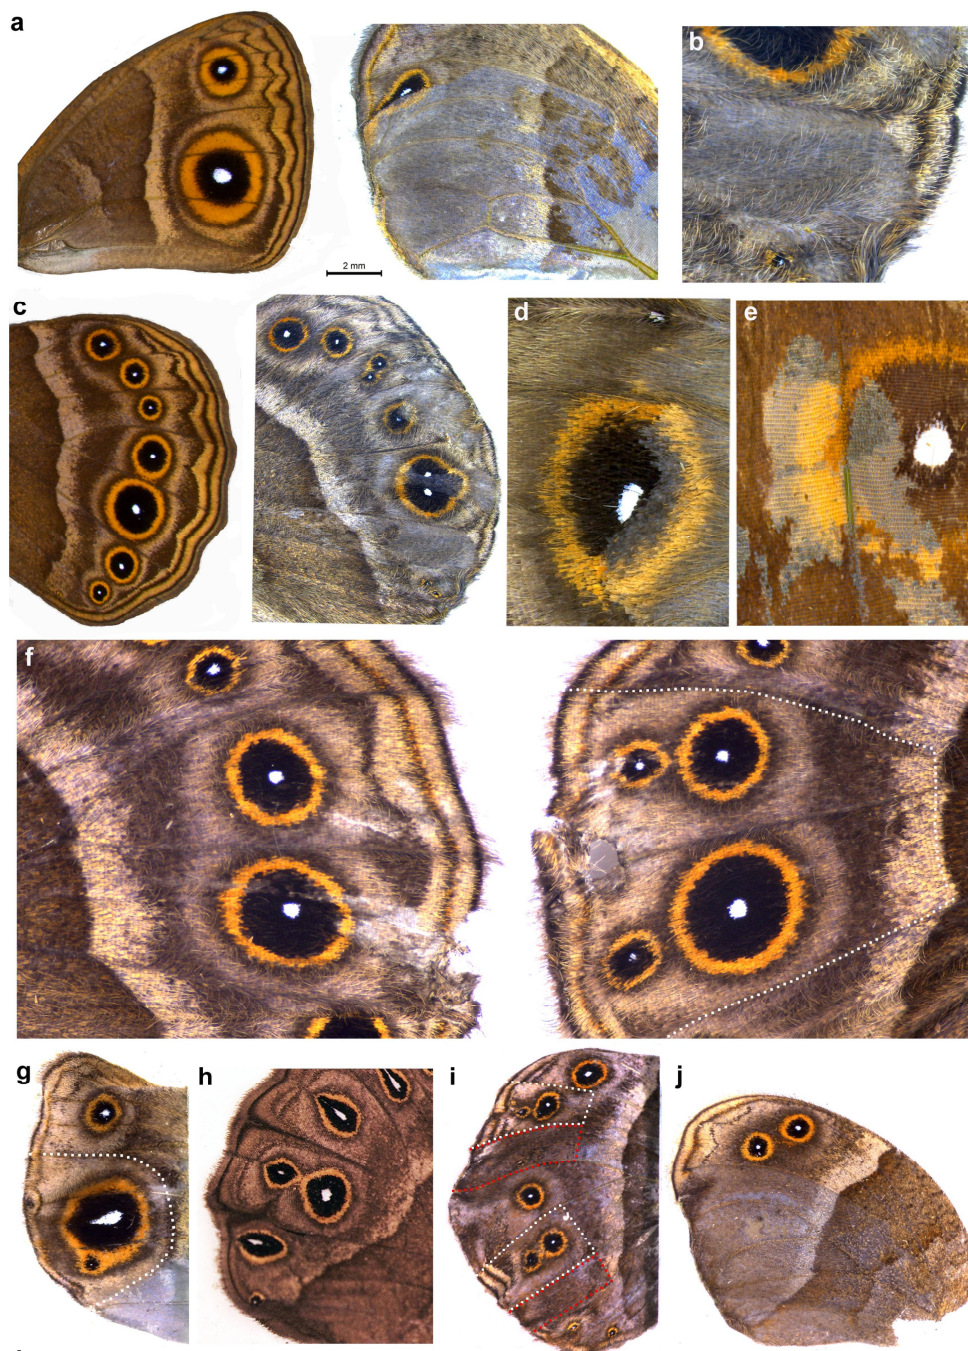

**k**

|                         |                                                                                                  |
|-------------------------|--------------------------------------------------------------------------------------------------|
| <b>WT Exon 3</b>        | GCCTGTTGAGCTGCTGCAGCTGCAAGCTGGAGTAGATGGTGC <del>CGG</del> CTTGCGCATCTTCTTGCCCTTGCCATTACCCGAGCCCA |
| <b>Mutant c</b>         | GCCTGTTGAGCTG-----CITCTTGCCCTTGCCATTACCCGAGCCCA                                                  |
| <b>Mutant d</b>         | GCCTGTTGAGCTGCTGCAGCTGCAAGCTGGAGTA----GTGC <del>CGG</del> CTTGCGCATCTTCTTGCCCTTGCCATTACCCGAGCCCA |
| <b>WT Exon 2</b>        | GCAAACCCACCACGCTGAGTTTCTCAGATCCCTTTGGGCCTCCTCAGTCCAGC-----GACGGGGGGGGCCCGTCGACCCCGCA             |
| <b>Mutant f Ectopic</b> | GCAAACCCA-----TG-----GCA                                                                         |
| <b>Mutant g Comet</b>   | GCAAACCCACCACGCTGAGTTTCTCAGATCCCTTTGGGCCTCCTCAGTCCA-G-----GACGGGGGGGGCCCGTCGACCCCGCA             |
| <b>Mutant i Ectopic</b> | GCAAACCCACCACGCTGAGTTTCTCAGATCCCTTTGGGCCTCCTCAGTCCAGCTCCAGTGGACGGGGGGGGCCCGTCGACCCCGCA           |
| <b>Mutant i Missing</b> | GCAAACCCACCACGCTGAGTTTCTCAGATCCCTTTGGGCCTCCTCAGTCCAGCTCCAGTGGACGGGGGGGGCCCGTCGACCCCGCA           |

150

151 **Figure 2 | CRISPR mutants generated by targeting exon 2 and exon 3 of *Dll*** – (a) Wildtype forewing of  
152 *B. anynana* (left) Exon 3 phenotype with eyespots missing in areas of lighter pigmentation and disrupted  
153 venation (right). (b) Exon 3 phenotype with missing eyespot in a patch with mutant clones. (c) Wildtype  
154 hindwing of *B. anynana* (left) Exon 3 phenotype with split eyespots and bisected eyespot centers. (d)  
155 Exon 3 phenotype showing light colored scales in mutant clones across an eyespot. (e) Exon 3  
156 phenotype with missing scales. (f-j) Exon 2 mutations. (f) Wildtype (left) and mutant wing (right) of the  
157 same individual where ectopic eyespots appeared on the distal hindwing margin after Exon 2 was  
158 targeted. (g) Comet shaped Cu1 eyespot center. (h) Example of a spontaneous comet mutant. (i) Wing  
159 with ectopic eyespots as well as missing eyespots. (j) Missing eyespots on hindwing in mosaic areas also  
160 showing lighter pigmentation. (k) Next generation sequencing of selected mutants (Exon 3 top panel  
161 and Exon 2 bottom panel) identifying the most frequent indels around the target site (Orange: guide  
162 region, Red: PAM sequence Blue: insertions, Dashed lines: deletions). Dotted lines on Exon 2 mutants  
163 in f, g and i represent wing regions carefully dissected for DNA isolation. Wing sectors for mutant i  
164 outlined in red (missing eyespots) were pooled for DNA isolation as were wing sectors outlined in white  
165 (ectopic eyespots). For Exon 3 mutant c the entire distal wing margin was dissected and for mutant d  
166 the area around the eyespot was dissected.

### 167 168 **Targeting exon 2 induces alternative splicing**

169 To explain the presence of ectopic eyespots following exon 2 CRISPR-Cas9 disruptions we examined the  
170 resulting cDNA sequences. RNA was isolated from embryos injected with each of the three guides (and  
171 Cas9) as well as from wild-type non-injected embryos. PCR amplification from cDNA using primers  
172 spanning exon 1 to exon 6 revealed that embryos injected with either Sg1 or Sg2, targeting exon 2,  
173 produced a novel product approximately 500 bp shorter than the wild-type product. Sequencing this  
174 short product revealed a deletion of 492 bp representing exon 2, suggesting that this exon had been  
175 completely spliced out. In contrast, we did not observe any alternative splicing for cDNA obtained from  
176 wild-type embryos or embryos injected with Sg3 (Supplementary Fig. 5).

177 To examine whether targeting exon 2 resulted in ectopic eyespots due to *Dll* overexpression we  
178 performed qPCR on cDNA from embryos injected either with Sg1 or Sg3, using primers designed to  
179 amplify exon 1. The aim of this experiment was to capture all *Dll* transcripts including the alternative  
180 spliced variants and to quantify them. The results did not reveal any significant differences in *Dll*  
181 expression after normalizing the data to our internal control gene EF1 alpha (*Dll* exon 1;  $p=0.66$ , EF1  
182 alpha;  $p=0.08$ ). Overall expression levels of *Dll* were low, with average Ct values of 29.88, S.E. = 0.43  
183 (Sg) and 30.6, S.E. = 0.48 (Sg3)  $n = 4$ .

### 184 **Morphogens provide dynamic positional information in each developing wing sector**

185 Several of the mutant *Dll* phenotypes suggested that this gene is involved in the process of eyespot  
186 center differentiation, which takes place during the late larval stage<sup>12,21</sup> (Fig. 1c). Intriguing phenotypes  
187 involved the disappearance of eyespots, the splitting of the eyespot centers within a single wing sector  
188 bordered by veins, and the appearance of deformed eyespot centers and color rings near boundaries  
189 of wild-type and mutant tissue. In order to better understand how *Dll*, a transcription factor, might lead  
190 to such phenotypes we began by examining the distribution of diffusible proteins (morphogens) able  
191 to provide complex spatial information within each wing sector. We tested whether two previously  
192 hypothesized morphogens, Wingless (Wg) and Decapentaplegic (Dpp), known to be involved in *Dll*  
193 regulation in early leg discs of *Drosophila*<sup>22</sup>, were expressed in *B. anynana* wing discs in the 5<sup>th</sup> instar  
194 larvae. We cloned a 810 bp fragment for *B. anynana dpp* using specific primers (Supplementary Table  
195 3) and performed *in situ* hybridizations. For visualization of Wg signaling, we looked at the expression  
196 of Armadillo (Arm) protein, a signal transducer of the Wg signaling pathway<sup>23</sup>. In young 5<sup>th</sup> instar wing  
197 discs we observed a *dpp* stripe in the middle of the wing discs, separating anterior from posterior wing  
198 compartments, as expected from work on *Drosophila*<sup>24</sup> (Supplementary Fig. 6a), but in slightly older  
199 larval discs, *dpp* was expressed across the whole wing, with slightly elevated expression in regions  
200 flanking each vein, and reduced expression in the future eyespot centers as well as in the midline of  
201 each wing sector (Fig. 3a, Supplementary Fig. 6b,c). At a late larval stage, *dpp* expression declines  
202 everywhere with the exception of the antero-posterior stripe (Supplementary Fig. 6d). Arm, on the  
203 other hand, was highly expressed in areas where *dpp* was missing, e.g., along the wing margin, and in  
204 the eyespot centers and in the midline (Fig. 3b, Supplementary Fig. 6e,f). We used information from  
205 these dynamic gene expression patterns, as well as from *Dll*, to model eyespot center differentiation.



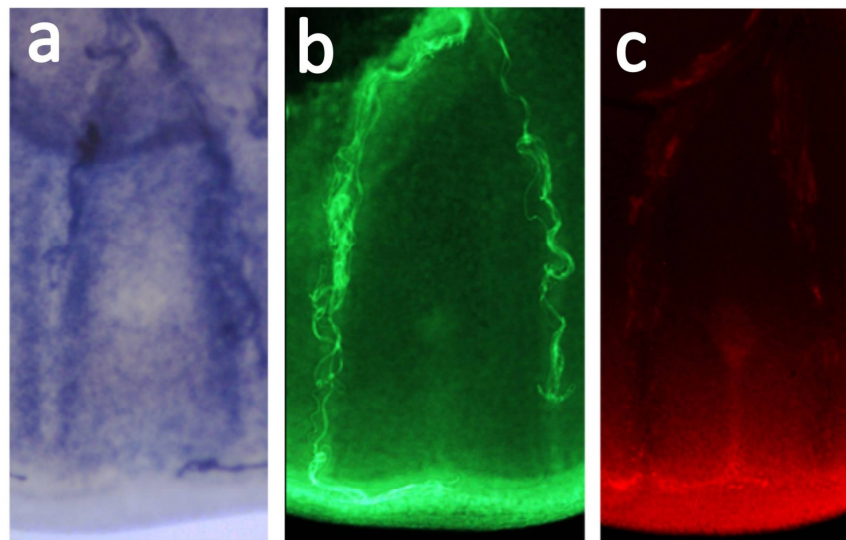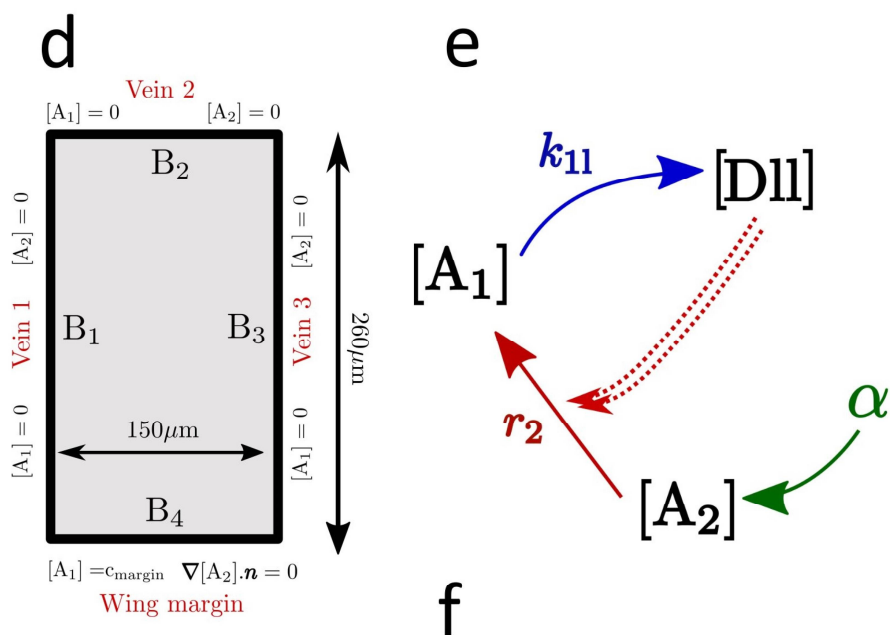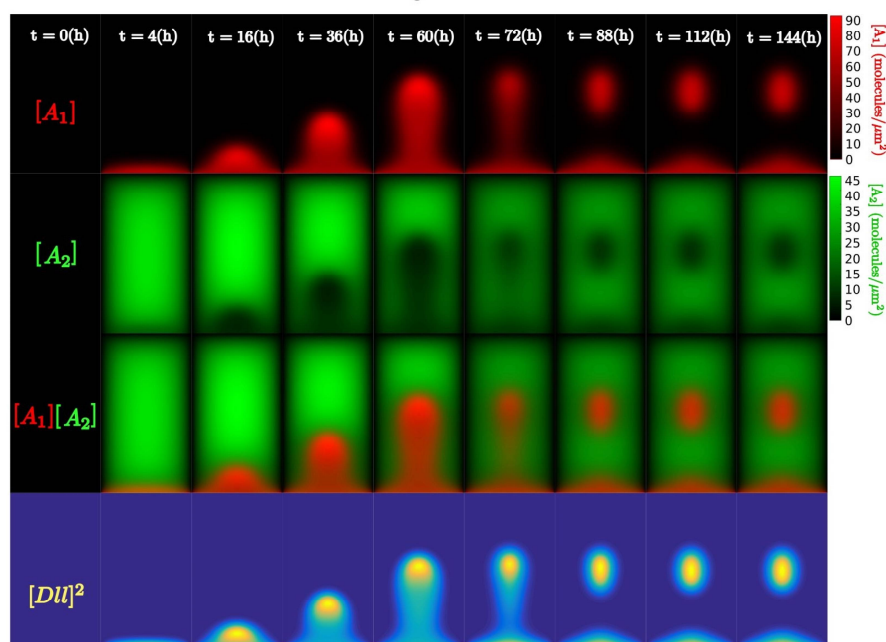

206 **Figure 3 | Morphogenetic inputs and modeling of eyespot formation.** (a) *dpp* is expressed across the  
207 wing compartment but levels are lower in the eyespot centers. (b) *Arm* is located in eyespot centers,  
208 mid-line, as well as the wing margin. (c) *Dll* has a similar localization pattern to *Arm*. (d) Boundary  
209 conditions and size for the wing compartment. The boundaries with veins are modeled as sinks for both  
210  $A_1$  and  $A_2$ . At the wing margin  $A_1$  is imposed at a fixed concentration  $c_{margin}$ , while we impose zero-flux  
211 conditions on  $A_2$ . (e) Interaction network involving the activator  $A_1$ , the substrate  $A_2$  and *Dll*. *Dll*  
212 interacted cooperatively with itself (double dashed line) and with  $A_2$  to induce  $A_1$ . During the reaction  
213  $[A_2]+2[Dll]\rightarrow[A_1]$ ,  $A_2$  was degraded.  $A_2$  is produced uniformly throughout the compartment. (f) Time-  
214 lapse results of reaction-diffusion simulation of eyespot centering. Concentration of  $A_1$  (first row) and  
215  $A_2$  (second row) over 6 days. Third row is the overlap of  $A_1$  and  $A_2$ . Fourth row represents square of *Dll*  
216 concentration, as this represents the *Dll* signaling incorporated within the model (see panel e).

### 217 **Gray-Scott model of eyespot formation**

218 To probe the mechanism of eyespot center formation we utilized theoretical modeling to explore  
219 potential interactions between morphogens and the transcription factor *Dll*. In particular, our goal was  
220 to test whether such models could replicate the *Dll* mutant phenotypes by incorporating *Dll* as one of  
221 the components in the model and removing *Dll* function from patches of cells *in silico* that map to the  
222 patches of lighter coloration in *Dll* mutant wings.

223 We turned to a Gray-Scott reaction-diffusion model (also known as the Gierer-Meinhardt activator-  
224 depleted substrate model)<sup>25,26</sup>. A diffusible molecule  $A_1$  (putatively *Wg*) plays the role of an  
225 autocatalytic activator, and a diffusible molecule  $A_2$  (putatively *Dpp*) the role of a substrate that is  
226 degraded during activator production. A key difference between the Gray-Scott and activator-inhibitor  
227 reaction-diffusion models previously used for simulating spot formation – e.g. the Gierer-Meinhardt  
228 activator-inhibitor model,<sup>16</sup> (Supplementary Theoretical Modeling) – is in how new eyespots form. In  
229 activator-inhibitor models, new activator maxima (i.e. eyespot centers) typically form between two  
230 existing maxima. However, in the Gray-Scott model, new maxima can form via a single maxima splitting  
231 <sup>27</sup>. The latter scenario appears to be closer to the experimental observations in *Dll* mutants as well as  
232 in spontaneous comet mutants of *B. anynana* (Fig. 2h, Supplementary Figs. 7,8,9). Another reason to  
233 not focus on activator-inhibitor type models is that our data suggested that *dpp* mRNA and *Arm* protein  
234 were anti-localized, which is counter to the assumptions underlying such models of eyespot  
235 formation<sup>26</sup>.

### 236 **Incorporating *Dll* within the Gray-Scott model of eyespot formation**

237 We included *Dll* within the network as a downstream gene activated by  $A_1$ , which initially is expressed  
238 only along the wing margin. This is supported by the observation of co-localization of *Arm* and *Dll* (Fig.  
239 3b,c) and by the assumption that the known activation of *Dll* by *Wg* (via *Arm*) in the *Drosophila* wing  
240 margin<sup>28</sup> is conserved in butterflies.  $A_2$  (*Dpp*) is uniformly produced throughout the wing compartment  
241 at a rate  $\alpha$ , consistent with our *in situ* observations (Fig. 3b, Supplementary Fig. 6). *Dll* acts cooperatively  
242 with itself and conjointly with  $A_2$  to catalyze  $A_1$  production. These modeled interactions – though  
243 obviously a simplification – are compatible with data that show ectopic *Dll* activating endogenous *Dll* as  
244 well as *wg* in the wing and leg discs of *Drosophila*<sup>29</sup>. In this system,  $A_1$  production (e.g. *Wg*) is associated  
245 with  $A_2$  (e.g. *Dpp*) effective degradation, which could correspond to either real degradation or  
246 downregulation of  $A_2$  by  $A_1$  or by *Dll*. These interactions are summarized in Fig. 3e and they result in the  
247 anti-colocalization of  $A_1$  and  $A_2$ , as experimentally observed. We emphasize that  $A_1$  and  $A_2$  do not  
248 correspond to single molecules, but more likely to sub-networks, with *Wg* and *Dpp* belonging to the  
249 sub-networks represented by  $A_1$  and  $A_2$  respectively.

250  
251 The system we modeled is described by the following reaction-diffusion equations for the  
252 concentrations of  $A_1$  and  $A_2$ , denoted by  $[A_1]$  and  $[A_2]$ . The action of *Dll* is included within the non-  
253 linear reaction term ( $K[A_1]^2[A_2]$ ) (see Supplementary Theoretical Modeling for further details):

$$254 \frac{\partial [A_1]}{\partial t} = K[A_1]^2[A_2] - k_1[A_1] + D_1 \nabla^2 [A_1] \quad \text{Eq. 1}$$

$$255 \frac{\partial [A_2]}{\partial t} = \alpha - K[A_1]^2[A_2] - k_2[A_2] + D_2 \nabla^2 [A_2] \quad \text{Eq. 2}$$

256  
257

258 where  $\nabla^2$  represents the two-dimensional Laplacian operator. The diffusion ( $D_1$  and  $D_2$ ), degradation ( $k_1$   
259 and  $k_2$ ) and  $\alpha$  (production of  $A_2$ ) rates are constrained by measurements in *Drosophila*<sup>30</sup> and  $K$   
260 (representing the interaction between Dll,  $A_1$  and  $A_2$ ) is unknown. See Methods for details of boundary  
261 and initial conditions and Supplementary Theoretical Modeling for detailed description of simulation  
262 implementation and parameter tables. We constrained our parameter values to lie within the spot  
263 formation region of the phase space, where the reaction producing  $A_1$  degrades  $A_2$  at the same rate  
264 <sup>31,32</sup> Supplementary Fig. 8,10, Supplementary Theoretical Modeling).

265

### 266 **Gray-Scott model accurately replicates eyespot formation dynamics during larval stage**

267 This reaction network produced a broad patch of activator ( $A_1$ ) up-regulation that narrows until it is  
268 along the midline and then further reduces to form a single spot, consistent with experimental  
269 observations (Fig. 3a,b,c,f)<sup>33</sup>. The eyespot location was near the observed experimental position using  
270 boundary conditions consistent with *in situ* observations (Fig. 3a,b,c,d). During the whole dynamics,  $A_1$   
271 and  $A_2$  were spatially anti-correlated, in agreement with Arm and *dpp* anti-colocalization.

272

### 273 **Phase diagram of spot formation within the Gray-Scott model**

274 The position, size, and shape of the spot within the model were sensitive to Dll activity (parameter  $K$ )  
275 and  $A_2$  production rate (parameter  $\alpha$ ) with eyespot centers emerging at high  $K$  and  $\alpha$  (Supplementary  
276 Figs 7-8a). At lower values of  $K$  and  $\alpha$ , the reaction between activator and substrate was not sufficiently  
277 strong to overcome degradation of the activator and no eyespot formed.

278

### 279 **Gray-Scott model accurately replicates eyespot formation of exon 3 mutant clones**

280 We modeled *Dll* mutant clones as domains where *Dll* cannot be activated by  $A_1$ . Mutant patches of *Dll*  
281 mutant cells were created within a simulated wing sector field by setting  $K$  to zero (red outlined regions  
282 in Fig. 4b). Outside this mutant patch, the reactions and boundary conditions remained unchanged. We  
283 assumed that  $A_1$  can diffuse within the *Dll* null region and that diffusion and production of  $A_2$  are not  
284 affected in that same region. We modeled seven *Dll* mutant clones where the mutant cells are present  
285 in different parts of the wing sector: (1) *Full*, covering the whole sector; (2) *Top*, covering the upper  
286 region of the wing compartment; (3) *Sliver*, present along one of the side veins; (4) *Diagonal*, distal from  
287 the wing margin; (5) *Comet*, distal from the wing margin but including part of the margin; (6) *Center*,  
288 present along a stripe at the center; and (7) *Corner*; present in two opposite corners of the sector (Fig.  
289 4b,c,d,e,f,g,h). Our model was able to closely reproduce all the mutant phenotypes. For each phenotype  
290 we had the correct number of eyespot centers differentiated and they were positioned in close accord  
291 with our experimental observations. For comparison, we performed simulations of the same clones  
292 using the Gierer-Meinhardt activator-inhibitor type model, which reproduced most of the observed *Dll*  
293 mutant phenotypes, but did not have anti-colocalization of the two morphogens ( $A_1$  and  $A_2$ )  
294 (Supplementary Fig. 13,14, Supplementary Theoretical Modeling).

295

### 296 **Our model accurately predicts ectopic eyespots and the comet phenotype from exon 2 mutants**

297 Alternative splicing of exon 2 is associated with the differentiation of two eyespots and with comet-  
298 shaped eyespots. These phenotypes do not show associated pigmentation defects, and thus, it is  
299 unclear the extent of the *Dll* mutant clone that produced them. Therefore, we modeled these mutants  
300 by assuming cells expressed a functional truncated Dll protein across the whole wing sector, which  
301 degraded more slowly than its wild-type version, effectively resulting in increased  $K$  (Supplementary  
302 Theoretical Modeling). Increasing  $K$  while keeping all other parameters fixed led to a spot size increase,  
303 until at some threshold value the spot splits vertically into two smaller spots. This phenotype was very  
304 similar to the phenotypes observed in Fig. 2f,i, Fig.5b,c. Further increasing  $K$  resulted in the double spot  
305 phenotype turning into an extended finger pattern, close to the observed comet phenotype (Fig. 2g,  
306 Supplementary Figs. 8,9).

307

### 308 **Model predictions on eyespot size**

309 Experimentally, it is known that reducing *Dll* expression across the whole wing results in reduced  
310 eyespot size<sup>7</sup>. Keeping our model parameters fixed, we reran the simulations with reduced values of  $K$ ,  
311 which corresponds to reduced Dll production (Fig. 5a). The simulations support these experimental  
312 finding by showing that reducing  $K$  also results in smaller eyespots (Fig. 5d).

313



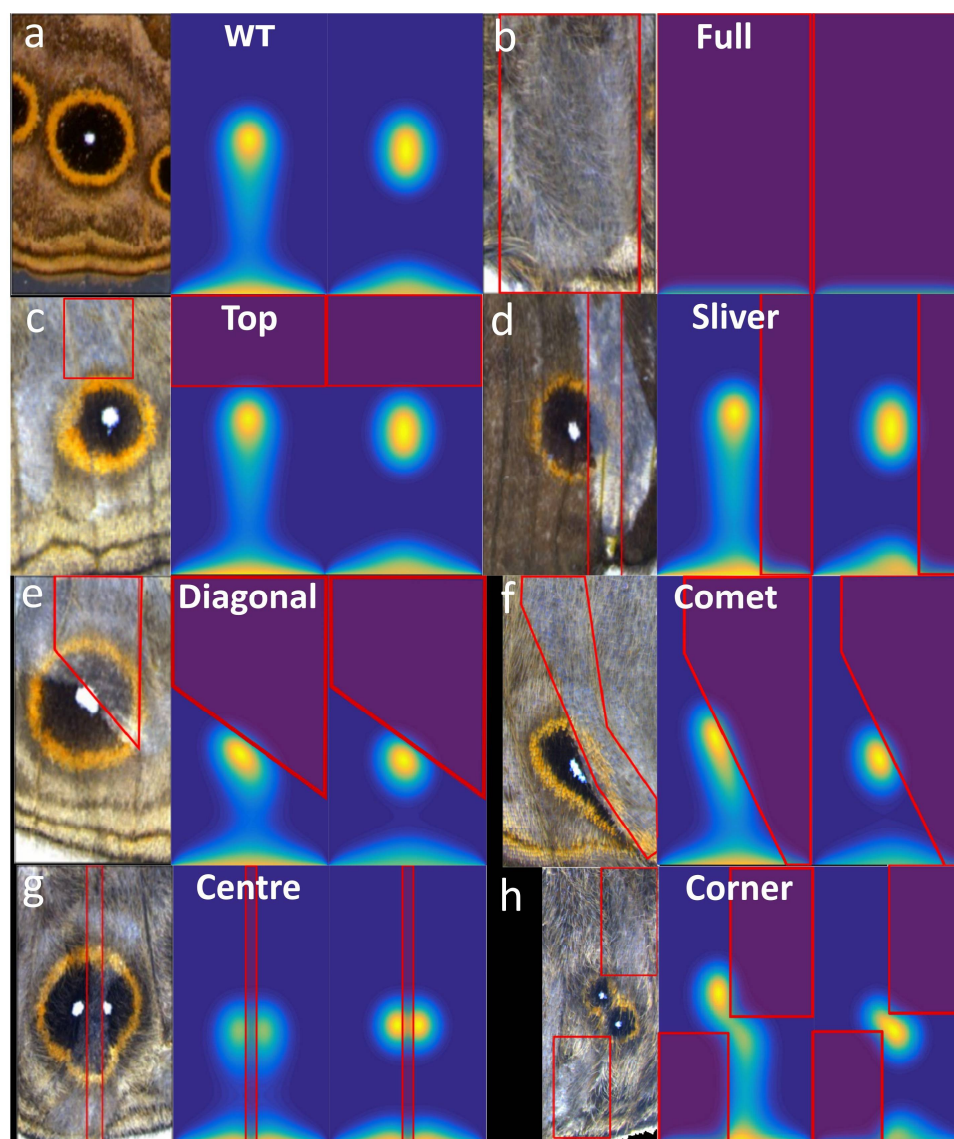

314  
315  
316  
317  
318  
319  
320  
321  
322  
323  
324

**Figure 4 | Reaction-diffusion simulations of wing sectors where part of the sector (red outline) has no “activator” function.** For each panel, left image shows the experimental data. The right shows the *in silico* results after 72 hours and 144 hours, orientation of compartment and parameters are the same as in Fig. 3a. The region inside the red boxes in each images (except in a), represent the *Dll* mutant region, where  $K=0$ . See text for description of each phenotype.

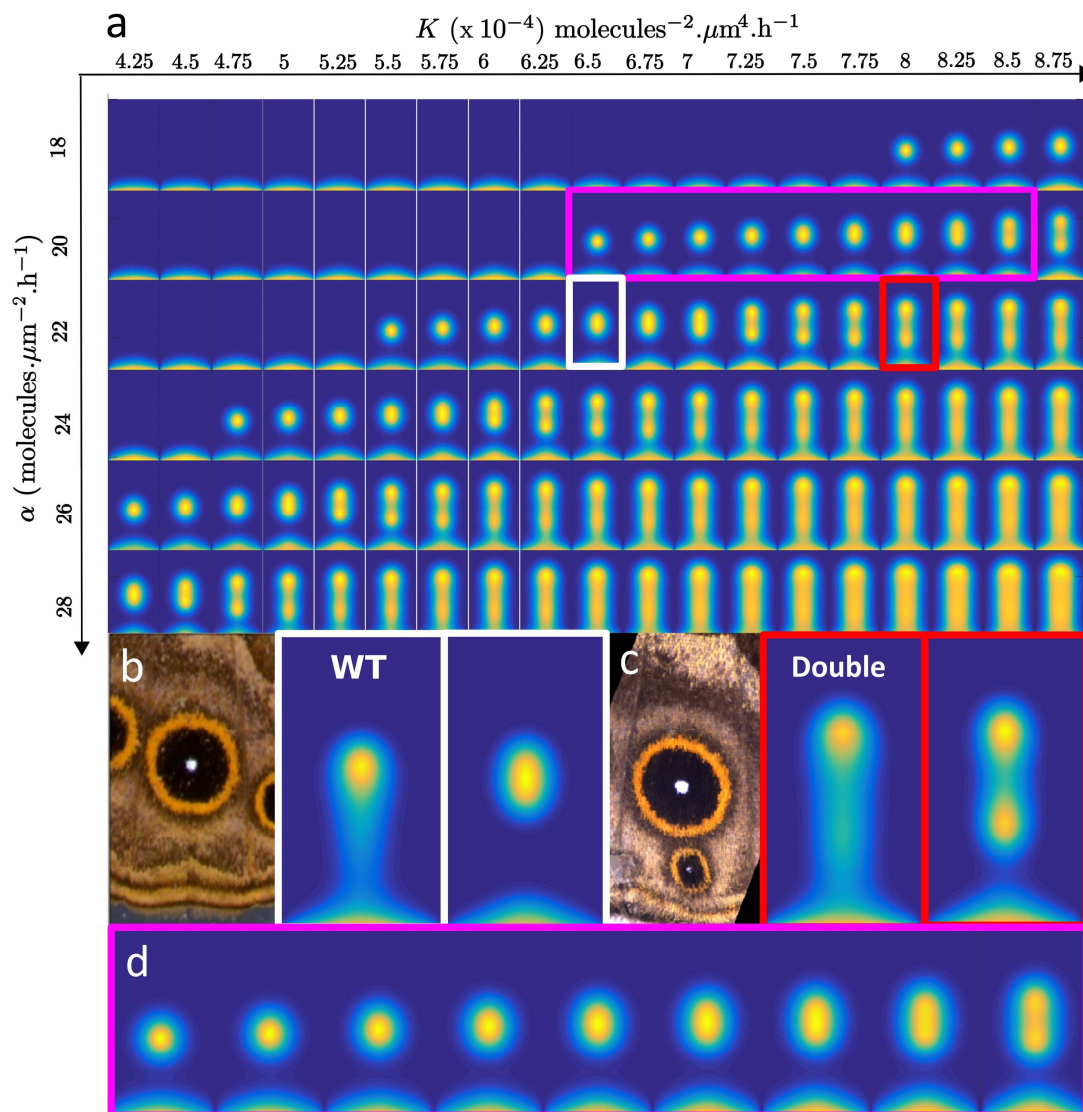

325

326 **Figure 5 | Perturbations of the Gray-Scott model and the  $K$ - $\alpha$  phase diagram reveal high sensitivity to**  
 327 **changes in  $D_{II}$  functionality.** (a) Phase diagram of  $A_1$  at  $t = 144$ h for different  $K$  and  $\alpha$  parameters. (b) The  
 328 parameters used for the wild-type correspond to the white rectangle in a. (c) Increasing  $K$  leads to  
 329 appearance of a second spot. (d) Spot size increases when  $K$  increases with other parameters fixed,  
 330 until spot splitting at high  $K$ . Region shown is close-up of pink region highlighted in panel a.  
 331

## 332 Discussion

333

334 Gene expression studies have always showed a positive correlation between *Dll* expression and the  
335 number and size of eyespots that differentiate on the wings of different butterfly species, including *B.*  
336 *anymana* and *V. cardui*<sup>2,3,8,34</sup>. During the larval stages, *Dll* is expressed in the center of the wing sectors  
337 where eyespots will develop, and is absent from the wing sectors where eyespots will not develop<sup>7,8</sup>.  
338 In a recent study, Zhang and Reed (2016)<sup>8</sup> found that CRISPR-Cas9 targeting exon 2 of *Dll* in *V. cardui*  
339 led to ectopic eyespots in wing sectors that normally display no eyespots, leading to the proposal that  
340 *Dll* must be a repressor of eyespot development. Mechanistically, however, this result is difficult to  
341 explain, as pointed out by the authors. Why would an eyespot repressor gene be naturally absent in  
342 sectors without eyespots and present in sectors with eyespots?

343 To explore this conundrum, we replicated these experiments in *B. anymana*. Similar to Zhang and Reed,  
344 we found that targeting the same regions of exon 2 resulted in butterflies with ectopic eyespots in  
345 addition to butterflies with missing eyespots, the latter of which was not observed in *V. cardui*. By  
346 exploring the effect of the guide RNAs on cDNA sequences obtained a few days after embryonic  
347 injections we found that disruptions in exon 2 produced transcripts completely lacking this exon,  
348 regardless of whether disruptions occurred in the 5'UTR or coding region of this exon. In contrast,  
349 several indels, but no exon skipping, occurred when targeting exon 3, indicating these disruptions led  
350 to a non-functional product. Furthermore, we only observed ectopic eyespots when targeting exon 2,  
351 suggesting that development of novel eyespots was a consequence of this exon splicing event.

352 Our simulation results predict that eyespot duplications can occur if the rate of *Dll* degradation is  
353 reduced across the wing cell, essentially leading to *Dll* overexpression. This led us to speculate that  
354 expression levels of *Dll* would be higher in embryos injected with Sg1 relative to Sg3. Our findings  
355 however did not support this hypothesis, possibly due to the overall low expression levels of *Dll* during  
356 embryonic development. Alternatively, it is possible that splicing is not impacting gene expression levels  
357 but is instead altering downstream processes affecting translation efficiency<sup>35</sup>. The loss of exon 2 would  
358 have resulted in a shorter 5'UTR region, an alteration that is known to increase translation activity due  
359 to removal of inhibitory secondary structures and translational repressive elements<sup>36,37</sup>.

360 A number of recent studies have shown that CRISPR-induced mutations can lead to alternative splicing  
361 and even gain of function phenotypes<sup>38-40</sup>. Our results suggest that CRISPR-Cas9 targeting of exon 2  
362 led to a truncated but potentially functional *Dll* transcript utilizing one of the numerous start codons  
363 present in exon 3 to produce an intact reading frame (Supplementary Fig. 5). In addition to ectopic  
364 eyespots, we also observed comet shaped eyespots which, in the spontaneous comet mutant, are  
365 associated with strong expression of *Dll*, suggesting an overexpression phenotype (Supplementary Fig.  
366 9). Our modeling work also predicts comet phenotypes due to the emergence of a stable *Dll* finger as a  
367 result of increased protein expression. Future experiments will need to be performed for a fuller  
368 understanding of this phenomenon. In the meantime, it is interesting to note that a *Dll* over-expression  
369 phenotype may be easily achieved via disruptions to exon 2 of *Dll*.

370 A particularly curious observation was the emergence of butterflies with both missing and ectopic  
371 eyespots in different parts of the wing. By isolating wing tissue from these specific regions we hoped to  
372 correlate the frequency of a particular type of mutation with a particular phenotype (ectopic versus  
373 absent eyespots) using next-generation sequencing but we did not entirely succeed. Similar mutations  
374 were associated with both phenotypes. Our analysis also revealed that mutations associated with splice  
375 sites were extremely rare, thus exon skipping is likely occurring as a consequence of random DNA  
376 damage within this exon. It is well documented that exon skipping can be induced by a variety of  
377 mutations (nonsense, missense and silent) as well as varying sizes from single point mutations to large  
378 genomic deletions<sup>40</sup>. Based on our findings, we propose that different phenotypes observed in adult  
379 wings may be related to the spatial distribution of each mutant cell clone in the wing sector, which  
380 cannot be inferred from the adult wing tissue and from particular mutation events inducing exon  
381 skipping, which so far we were unable to identify.

382 In contrast, guide RNAs targeting exon 3 led to typical missense mutations and to missing eyespots



383 indicating that *Dll* is required for eyespot differentiation. A previous study performed in *B. anynana*  
384 had already functionally implicated *Dll* as a positive regulator of eyespot development, but the results  
385 were less stark than those reported here. *Dll* down-regulated via transgenic RNAi led to smaller  
386 eyespots, rather than missing eyespots, whereas its up-regulation led to two smaller eyespots  
387 appearing on the forewing<sup>7</sup>. The *Dll* down-regulation failed to remove eyespots presumably because  
388 it was implemented during a limited period during late larval development and because it likely failed  
389 to eliminate *Dll* transcripts altogether - compared to CRISPR which can induce complete *Dll*-null  
390 clones. The two studies, however, by obtaining essentially the same results via the use of two  
391 different approaches, confirm that *Dll* is a positive regulator of eyespot development in *B. anynana*  
392 and likely also in other species.

393 Reaction-diffusion models have been shown to correctly recreate the patterning of vertebrate skin  
394 colors, of digits in mice, and of distal fin elements in catsharks<sup>41-43</sup>. Our reaction-diffusion simulations -  
395 and in particular our ability to simulate the mutant phenotypes by simply implementing a region where  
396 the reaction term for *Dll* is removed - enabled us to dissect the processes by which eyespots emerge.  
397 Our modeling also supports a likely functional role for the morphogenetic ligands *Wg* and *Dpp* in  
398 eyespot formation, size, and positioning. An important corollary of our results is that activator-inhibitor  
399 models may not be suitable for studying eyespot patterning. The anti-localization of the *Wg* and *Dpp*  
400 signals suggests that activator-substrate models - such as the Gray-Scott model - may be more  
401 applicable to modeling eyespot patterning.

402 In addition to eyespot center differentiation, we confirmed that *Dll* has an additional role in wing  
403 melanization, previously shown in *B. anynana*<sup>7</sup>, as well as in *Drosophila biarmipes* and *Junonia orythia*  
404<sup>9,44</sup>. In *B. anynana*, ectopic expression of *Dll* during the early pupal wing led to patches of darker scales  
405 on the wing, whereas *Dll* RNAi led to no observable change in color<sup>7</sup>. The current *Dll* exon 3 mutants,  
406 with light colored patches of pigmentation, lend additional critical support for this function of *Dll*.

407  
408 *Dll* appears to have a further role in scale cell development. In several *Dll* mutants, a specific type of  
409 scale, the cover scales, or both cover and ground scales were missing from patches on the wing. Patches  
410 of scales with reduced pigmentation may have been *Dll* heterozygous clones, whereas those with scales  
411 missing may have been homozygous clones. This suggests that *Dll* is required for scale development.  
412 Scale cells, due to their pattern of division, differentiation and growth, and expression of an *achaete-*  
413 *scute* homologue, were proposed to be homologous to *Drosophila* sensory bristles, which share similar  
414 characteristics but are restricted to the anterior margin in the fly wing<sup>45</sup>. In *Drosophila*, *Dll* mutant  
415 clones along the wing margin lead to loss of *achaete-scute* expression and loss of bristles<sup>46</sup>. Our results  
416 further strengthen the hypothesis that butterfly wing scales are novel traits that originated from  
417 modified sensory bristles, which populated the entire wing blade.

## 418 **Conclusions**

419  
420 Here, we show that CRISPR cas-9 induced mutations in *Dll* can produce both knockout and gain of  
421 function phenotypes depending on which specific exon is targeted. While we still do not understand  
422 which mutations lead to the different mutant phenotypes, we propose that gain of function phenotypes  
423 are associated with alternative splicing of *Dll*. Our results also demonstrate that *Dll* is required for  
424 eyespot differentiation and for the production of melanin pigmentation across the whole wing, not just  
425 in the black regions of the eyespot, where its expression is stronger. Furthermore, our work confirms  
426 the involvement of *Dll* in ventral appendage development in *B. anynana*, and additionally in scale  
427 development, a function not previously reported for this gene. Finally, we provide a detailed reaction-  
428 diffusion model that accurately describes the dynamics of both wild-type and mutant eyespot  
429 formation, and identify the first molecule, *Dll*, playing a role in this reaction-diffusion process.

## 430 **Acknowledgements**

431 HC and JVC were funded by the Ministry of Singapore grant MOE2014-T2-1-146 and  
432 MOE2015-T2-2-159 awarded to AM; ST was funded by a HFSP Young Investigator Grant  
433 (RGY0083/2016) awarded to TES. TES was also supported by a National Research Foundation Fellowship  
434 (NRF2012NRF-NRFF001-094). We gratefully acknowledge Kathy Su, Gowri Rajaratnam and Rudolf  
435 Meier (DBS, NUS) for facilitating Next Generation sequencing and for stimulating discussions on the

436 research. We also thank Nick Tolwinsky for providing the Arm antibody, Yuji Matsuoka for technical  
437 advice on CRISPR experiments and Firefly farms, Singapore, for the corn supply.

438

#### 439 **Author Contributions**

440 H.C., S.T, T.E.S and A.M designed the study and wrote the paper. S.T, T.Y.J.L: reaction-diffusion  
441 modeling. H.C: CRISPR/Cas9 genome editing on exon 2, cDNA synthesis, gene cloning, qPCR and Next  
442 Generation Sequencing analysis. J.v.C: CRISPR/Cas9 genome editing on exon 3. T.B: *In situ*  
443 hybridization and antibody stainings. All authors read and approved the final manuscript.

#### 444 **Materials and Methods**

445

##### 446 **Animal husbandry**

447 *B. anynana* were reared at 27°C and 60% humidity inside a climate room with 12:12hrs light : dark cycle.  
448 All larvae were fed young corn leaves until pupation. Emerged butterflies were frozen and then the  
449 wings were cut from the body for imaging using a Leica DMS1000 digital microscope.

450

##### 451 **Guide RNA design**

452 Guide RNAs corresponding to GGN<sub>20</sub>NGG (DII) were designed using CRISPR Direct<sup>47</sup>. We separately  
453 targeted three sites in DII with two guides targeting exon 2, (in the 5'UTR and coding sequence) and a  
454 third guide targeting the homeobox of exon 3 (Fig. 1a). The guide RNAs were created by amplifying  
455 overlapping primers<sup>48</sup> (Supplementary Table 3) using Q5 polymerase (New England Biolabs). One  
456 primer contains the T7 promoter sequence and gene target region and the other is a common reverse  
457 primer composed of the guide RNA backbone. Constructs were transcribed using T7 polymerase and  
458 (10X) transcription buffer (New England Biolabs), RNase inhibitor (Ribolock), NTPs (10mM) and 300ng  
459 of the guide template. Final sample volume was 20 µl. Samples were incubated for 16h at 37°C and  
460 then subject to DNase treatment at 37°C for 1 hour. Samples were purified by ethanol precipitation and  
461 RNA size and integrity was confirmed by gel electrophoresis.

462

##### 463 **In vitro cleavage assay**

464 The guide RNAs were tested using an in vitro cleavage assay. Wildtype genomic DNA was amplified  
465 using primers designed to the region flanking the guide RNA target sites. Guide RNA (160ng) and Cas9  
466 protein (322ng), 10X buffer (1 µl) were brought to a final volume of 10 µl with nuclease free water and  
467 incubated for 15 mins at 37°C. The purified amplicon (100ng) was added and the reaction incubated for  
468 a further 1-2h at 37°C. The entire reaction volume was analysed on a 2% agarose gel. Cas9 protein was  
469 purchased from two suppliers, NEB EnGen Cas9 NLS (Exon 2 injections) and PNA Bio Inc. (Exon 3  
470 injections).

471

##### 472 **Embryo injections**

473 Wildtype *B. anynana* adults were allowed to lay eggs on corn plants. Eggs were picked within one hour  
474 after oviposition and immobilised with 1mm wide strips of double sided tape in plastic 90mm petri  
475 dishes. Cas9 protein and guide RNA were prepared in a 10µl volume and incubated for 15 mins at 37°C  
476 prior to injection along with 0.5 µl of food dye to aid embryo injections (Table 1). The mixture was  
477 injected into eggs by nitrogen driven injections through glass capillary needles. Injected eggs were  
478 stored in closed petri dishes, accompanied by daily re-dampened cotton balls to maintain humidity.  
479 After hatching, larvae were reared in small containers for one week then moved to corn plants to  
480 complete their development.

##### 481 **Screening and genotyping mutants**

482 Upon emergence, butterflies were immediately stored at -80°C in individual containers. All individuals  
483 were screened under a microscope and examined for asymmetric mutant phenotypes. For selected  
484 mutants, genomic DNA was extracted from dissected wing tissue displaying mutant clone regions and  
485 modified/ectopic eyespots (E.Z.N.A tissue DNA kit). For next generation sequencing, amplicons shorter  
486 than 500 bp incorporating exon 2 or exon 3 were amplified using barcoded primers by PCR  
487 (Supplementary Table 3). The samples were visualized on a gel to confirm the presence of a single band  
488 then purified using Thermo Scientific PCR purification kit. The purified products were quantified using  
489 Qubit and sequenced using Illumina Miseq (300 bp paired-end). Exon 3 mutants were sequenced with  
490 AIT (Singapore), and exon 2 mutants were sent to GIS (Singapore). Sequencing coverage was 10,000x.

491 Demultiplexing was performed on an in-house python script<sup>49</sup>. The fastq files were checked for quality  
492 and trimmed using PRINSEQ<sup>50</sup>. The trimmed files were processed using the command line version of  
493 CRISPResso<sup>20</sup>.

494

495

496

#### 497 **Detection of alternative splicing and quantitative PCR**

498 RNA was isolated from injected eggs (guides targeting 5'UTR of exon 2 (Sg1) and the homeobox domain  
499 of exon 3 (Sg3)) and control eggs (no injection) using Qiagen RNeasy mini kit incorporating a DNase 1  
500 treatment (Thermo Fisher Scientific). RNA was isolated 2 days after egg injection. For each treatment  
501 group, we prepared four replicates of 50 pooled eggs on the same day. To control for developmental  
502 timing, we alternated injecting 50 eggs between the two groups (Sg1 and Sg3) for a total of 200  
503 eggs/group. Eggs were placed in a petri dish of PBS and injected within 90 minutes of oviposition. After  
504 2 days, eggs were carefully removed from the PBS and briefly transferred to RNAlater® (Qiagen) prior  
505 to RNA isolation. For each of the 12 RNA samples, 2µg of RNA was used as input for cDNA synthesis  
506 (Thermo Scientific Revertaid First Strand). cDNA was also obtained from 50 pooled eggs injected with  
507 Sg2 in a separate experiment using the same protocol. A PCR was performed on the cDNA using *Dll*  
508 primers spanning exons 1-6 (wild-type = 1.5kb product) and visualized on a 1.5% agarose gel. The  
509 spliced transcript produced from the guide targeting the 5'UTR of exon was cloned into a pGEM t-easy  
510 vector followed by colony PCR using M13 primers to identify colonies carrying this product. The short  
511 insert (~1kb) was amplified using Big Dye sequencing kit (Thermo Fisher Scientific) and sequenced.

512

513 qPCR was performed on the cDNA from embryo's injected with Sg1 or Sg3 (representing exon 2 and  
514 exon 3 disruptions). Primers were designed using Primer3 plus for *Dll* exon 1 and an internal control  
515 gene EF1 alpha. Relative expression was performed using a qPCR mastermix (Kapa SYBR Fast Uni) and  
516 4ng of cDNA from 4 biological replicates and 2 technical replicates in a single experiment. Four  
517 biological replicates were tested to ensure sufficient statistical power to detect expression differences.  
518 The reaction was set up following the manufacturer's instructions and run on a BIORAD thermocycler.  
519 Relative expression software tool (REST) was used to analyze the expression data<sup>51</sup>.

520

#### 521 **In-situ Hybridization**

522 In-situ hybridization was performed on 5<sup>th</sup> instar larval wing discs. Wings were dissected in cold PBS  
523 and transferred into fixative containing 4% formaldehyde. After proteinase K treatment peripodial  
524 membranes were removed using fine forceps. The wings were then gradually transferred in increasing  
525 concentration of pre-hybridization buffer in PBST and incubated in pre-hybridization buffer at 65°C for  
526 1 hr before transferring into hybridization buffer containing 70ng/ml probe. Hybridization was carried  
527 out in a rocking-heating incubator at 65°C for 20 hrs. After hybridization wings were washed 5 times in  
528 pre-hybridization buffer for 20 mins at 65°C. Blocking was carried out using 1% BSA in PBST. Anti-  
529 digoxigenin AP(Roche) at the concentration 1:3000 was used to tag digoxigenin labelled probes.  
530 NBT/BCIP (Promega) in alkaline phosphatase buffer was used to generate color. Imaging was carried  
531 out under Leica DMS1000 microscope using LAS v4.9 software.

532

#### 533 **Antibody staining**

534 5<sup>th</sup> instar larval wing disc were dissected in cold PBS and incubated in fix buffer containing 4%  
535 formaldehyde for 35 mins, washed 4 times in cold PBS and blocked using block buffer for 2 days. Wings  
536 were stained against Armadillo using primary antibody (294 rabbit anti-Arm; a gift from Nicholas  
537 Tolwinski<sup>52</sup>) at the concentration of 1:10 and secondary antibody (alexa fluor 488 goat anti-rabbit:  
538 Thermo) at the concentration of 1:800. Wings were then mounted on prolong gold antifade reagent  
539 (Thermo) and imaged under Zeiss Axio Imager M2 using Zen 2012 software.

540

#### 541 **Modeling details**

542 *Parameter estimation:* We modeled a wing sector bordered by veins and containing a single eyespot as  
543 a rectangle with typical width  $L_x = 150 \mu\text{m}$  and length  $L_y = 262 \mu\text{m}$  (Fig. 3d)<sup>16</sup>. We used degradation  
544 and diffusion rates for both  $A_1$  and  $A_2$  close in magnitude to those measured for Wg and Dpp  
545 respectively in the *Drosophila* wing disc<sup>30</sup>. Due to the longer time scales involved in eyespot patterning,  
546 both degradation and diffusion rates were assumed to be smaller than in *Drosophila* (therefore, we  
547 explored values varying by a factor of 0.1 to 1). In line with experimental observations where we



548 observed a decrease in *dpp* (Supplementary Fig. 6) at late larval stage, we decreased  $\alpha$  by 25% at time  
549  $t = 60\text{h}$  in the simulation.

550 We present in Fig. 4 the results of the simulations for the different *Dll* mutant conditions. Results are  
551 shown for the parameter set that maximizes the matching between eyespot number and location(s) in  
552 the wing compartment between the simulations and the experimental data. The same parameter set  
553 was used in all simulation results shown. To model Exon 2 mutations, we increased  $K$ , which  
554 corresponds to either increasing *Dll* expression levels or decreasing its degradation rate (See  
555 Supplementary Theoretical Modeling).

556  
557 *Boundary conditions:* Boundary conditions were implemented based on the *in situs* and  
558 immunostainings for *dpp* and *Arm* (Fig. 3a,b). The wing margin was modeled as a source term of *Wg* as  
559 *Arm* is present along the wing margin of *B. anynana* and *wg* is also present along the wing margin of  
560 other butterflies<sup>53</sup>. As *dpp* is absent along the wing veins (Fig. 3a), we modeled the veins as sinks for  
561 both *Wg* and *Dpp*, which helped to confine the activator and substrate to the central part of the wing  
562 sector in a finger-like pattern (Fig.3d,f). These conditions differ from those used in<sup>15,16</sup> where the  
563 proximal cross-vein and lateral veins are the only sources of activator and inhibitor.

564 *Initial conditions:* At  $t = 0\text{h}$ , there are no activator and substrate in the wing sector. At  $t = 0\text{h}$ ,  $A_1$  starts  
565 to diffuse from the wing margin to the wing sector, and the substrate  $A_2$  is produced by all cells in the  
566 wing sector. We assume detailed balance in the reactions, which can lead to spot formation in the Gray-  
567 Scott model (Supplementary Theoretical Modeling).

#### 568 **Data availability**

569 The codes used to generate simulations and the images of all wings from butterflies showing  
570 phenotypes are available from the corresponding authors upon request.

## References

1. Monteiro, A. Origin, Development, and Evolution of Butterfly Eyespots. *Annu. Rev. Entomol.* **60**, 253–271 (2015).
2. Oliver, J. C. *et al.* Nymphalid eyespot serial homologues originate as a few individualized modules. *Proc. R. Soc. B* **281**, 20133262 (2014).
3. Oliver, J. C., Tong, X.-L., Gall, L. F., Piel, W. H. & Monteiro, A. A single origin for nymphalid butterfly eyespots followed by widespread loss of associated gene expression. *PLoS Genet.* **8**, e1002893 (2012).
4. Olofsson, M., Vallin, A., Jakobsson, S. & Wiklund, C. Marginal eyespots on butterfly wings deflect bird attacks under low light intensities with UV wavelengths. *PLoS One* **5**, (2010).
5. Prudic, K. L., Stoehr, A. M., Wasik, B. R. & Monteiro, A. Eyespots deflect predator attack increasing fitness and promoting the evolution of phenotypic plasticity. *Proc. R. Soc. London B Biol. Sci.* **282**, 20141531 (2015).
6. Shirai, L. T. *et al.* Evolutionary history of the recruitment of conserved developmental genes in association to the formation and diversification of a novel trait. *BMC Evol. Biol.* **12**, 21 (2012).
7. Monteiro, A. *et al.* Distal-less regulates eyespot patterns and melanization in *Bicyclus* butterflies. *J. Exp. Zool. B. Mol. Dev. Evol.* **320**, 321–31 (2013).
8. Zhang, L. & Reed, R. D. Genome editing in butterflies reveals that spalt promotes and Distal-less represses eyespot colour patterns. *Nat. Commun.* **7**, 1–7 (2016).
9. Dhungel, B. *et al.* Distal-less induces elemental color patterns in *Junonia* butterfly wings. *Zool. Lett.* **2**, 4 (2016).
10. Saenko, S. V., French, V., Brakefield, P. M. & Beldade, P. Conserved developmental processes and the formation of evolutionary novelties: examples from butterfly wings. *Philos. Trans. R. Soc. Lond. B. Biol. Sci.* **363**, 1549–55 (2008).
11. Tong, X., Hrycaj, S., Podlaha, O., Popadic, A. & Monteiro, A. Over-expression of Ultrabithorax alters embryonic body plan and wing patterns in the butterfly *Bicyclus anynana*. *Dev. Biol.* **394**, 357–66 (2014).
12. Brakefield, P. *et al.* Development, plasticity and evolution of butterfly eyespot patterns. *Nature* **384**, 236–242 (1996).
13. Brunetti, C. R. *et al.* The generation and diversification of butterfly eyespot color patterns. *Curr. Biol.* **11**, 1578–85 (2001).
14. Monteiro, A. *et al.* The combined effect of two mutations that alter serially homologous color pattern elements on the fore and hindwings of a butterfly. *BMC Genet.* **8**, 1–10 (2007).
15. Nijhout, H. F. A comprehensive model for colour pattern formation in butterflies. *Proc. R. Soc. London. B. Biol. Sci.* **239**, 81–113 (1990).
16. Sekimura, T., Venkataraman, C. & Madzvamuse, A. A model for selection of eyespots on butterfly wings. *PLoS One* **10**, 1–24 (2015).
17. Chen, B., Piel, W. H. & Monteiro, A. Distal-less homeobox genes of insects and spiders: Genomic organization, function, regulation and evolution. *Insect Sci.* **23**, 335–352 (2016).
18. Panganiban, G. Distal-less function during *Drosophila* appendage and sense organ development. *Developmental Dynamics* **218**, 554–562 (2000).
19. Brakefield, P. M. The evolution–development interface and advances with the eyespot patterns of *Bicyclus* butterflies. *Heredity (Edinb.)* **80**, 265–272 (1998).
20. Pinello, L. *et al.* Analyzing CRISPR genome-editing experiments with CRISPResso. *Nat. Biotechnol.* **34**, 695–697 (2016).
21. Carroll, S. B. *et al.* Pattern formation and eyespot determination in butterfly wings. *Science* **265**, 109–14 (1994).
22. Estella, C., McKay, D. J. & Mann, R. S. Molecular Integration of Wingless, Decapentaplegic, and Autoregulatory Inputs into Distal-less during *Drosophila* Leg Development. *Dev. Cell* **14**, 86–96 (2008).
23. Klingensmith, J. & Nusse, R. Signaling by wingless in *Drosophila*. *Dev. Biol.* **166**, 396–414 (1994).
24. Lecuit, T. *et al.* Two distinct mechanisms for long-range patterning by Decapentaplegic in the *Drosophila* wing. *Nature* **381**, 387–393 (1996).
25. Gray, P. & Scott, S. K. Autocatalytic reactions in the isothermal, continuous stirred tank reactor. *Chem. Eng. Sci.* **39**, 1087–1097 (1984).

26. Gierer A, M. H. A theory of biological pattern formation. *Biol. Cybern.* **12**, 30–39 (1972).
27. Koch, A. J. & Meinhardt, H. Biological Pattern Formation: from Basic Mechanisms to Complex Structures. *Rev. Mod. Phys.* **66**, 1481–1508 (1994).
28. Neumann, C. J. & Cohen, S. M. Long-range action of Wingless organizes the dorsal-ventral axis of the *Drosophila* wing. *Development* **124**, 871–880 (1997).
29. Gorfinkiel, N., Morata, G. & Guerrero, I. The homeobox gene *Distal-less* induces ventral appendage development in *Drosophila*. *Genes Dev.* **11**, 2259–71 (1997).
30. Kicheva, A. *et al.* Kinetics of Morphogen. *Science* **315**, 521–526 (2007).
31. Chen, W. & Ward, M. J. The Stability and Dynamics of Localized Spot Patterns in the Two-Dimensional Gray–Scott Model. *SIAM J. Appl. Dyn. Syst.* **10**, 582–666 (2011).
32. Rasmussen, K. E., Mazin, W., Mosekilde, E., Dewel, G. & Borckmans, P. Wave-Splitting in the Bistable Gray-Scott Model. *Int. J. Bifurc. Chaos* **6**, 1077–1092 (1996).
33. Reed, R. D., Chen, P.-H. & Frederik Nijhout, H. Cryptic variation in butterfly eyespot development: the importance of sample size in gene expression studies. *Evol. Dev.* **9**, 2–9 (2007).
34. Saenko, S. V., Marialva, M. S. & Beldade, P. Involvement of the conserved Hox gene *Antennapedia* in the development and evolution of a novel trait. *Evodevo* **2**, 9 (2011).
35. Nishimura, H., Washizu, J., Nakamura, N., Enomoto, a & Yoshikai, Y. Translational efficiency is up-regulated by alternative exon in murine IL-15 mRNA. *J. Immunol.* **160**, 936–942 (1998).
36. Cavatorta, A. L. *et al.* Regulation of translational efficiency by different splice variants of the Disc large 1 oncosuppressor 5'-UTR. *FEBS J.* **278**, 2596–2608 (2011).
37. Wang, X., Hou, J., Quedenau, C. & Chen, W. Pervasive isoform-specific translational regulation via alternative transcription start sites in mammals. *Mol Syst Biol* **12**, 1–16 (2016).
38. Kapahnke, M., Banning, A. & Tikkanen, R. Random Splicing of Several Exons Caused by a Single Base Change in the Target Exon of CRISPR/Cas9 Mediated Gene Knockout. *Cells* **5**, 45 (2016).
39. Lalonde, S. *et al.* Frameshift indels introduced by genome editing can lead to in-frame exon skipping. *PLoS One* **12**, 1–13 (2017).
40. Mou, H. *et al.* CRISPR/Cas9-mediated genome editing induces exon skipping by alternative splicing or exon deletion. *Genome Biol.* **18**, 108 (2017).
41. Kondo, S. & Miura, T. Reaction-diffusion model as a framework for understanding biological pattern formation. *Science (80-. )*. **329**, 1616–20 (2010).
42. Onimaru, K., Marcon, L., Musy, M., Tanaka, M. & Sharpe, J. The fin-to-limb transition as the re-organization of a Turing pattern. *Nat. Commun.* **7**, 11582 (2016).
43. Raspopovic, J., Marcon, L., Russo, L. & Sharpe, J. Modeling digits. Digit patterning is controlled by a Bmp-Sox9-Wnt Turing network modulated by morphogen gradients. *Science (80-. )*. **345**, 566–70 (2014).
44. Arnoult, L. *et al.* Emergence and diversification of fly pigmentation through evolution of a gene regulatory module. *Science* **339**, 1423–6 (2013).
45. Galant, R., Skeath, J. B., Paddock, S., Lewis, D. L. & Carroll, S. B. Expression pattern of a butterfly achaete-scute homolog reveals the homology of butterfly wing scales and insect sensory bristles. *Curr. Biol.* **8**, 807–13 (1998).
46. Campbell, G. & Tomlinson, a. The roles of the homeobox genes *aristaless* and *Distal-less* in patterning the legs and wings of *Drosophila*. *Development* **125**, 4483–4493 (1998).
47. Naito, Y., Hino, K., Bono, H. & Ui-Tei, K. CRISPRdirect: Software for designing CRISPR/Cas guide RNA with reduced off-target sites. *Bioinformatics* **31**, 1120–1123 (2015).
48. Bassett, A. R., Tibbit, C., Ponting, C. P. & Liu, J. L. Highly Efficient Targeted Mutagenesis of *Drosophila* with the CRISPR/Cas9 System. *Cell Rep.* **4**, 220–228 (2013).
49. Meier, R., Wong, W., Srivathsan, A. & Foo, M. Cladistics finding rare species in specimen-rich samples. *Cladistics* **32**, 100–110 (2015).
50. Schmieder, R. & Edwards, R. Quality control and preprocessing of metagenomic datasets. *Bioinformatics* **27**, 863–864 (2011).
51. Pfaffl, M. W., Horgan, G. W. & Dempfle, L. Relative expression software tool (REST) for group-wise comparison and statistical analysis of relative expression results in real-time PCR. *Nucleic Acids Res.* **30**, e36 (2002).
52. Colosimo, P. F. & Tolwinski, N. S. Wnt, hedgehog and junctional Armadillo/ $\beta$ -catenin establish planar polarity in the *Drosophila* embryo. *PLoS One* **1**, (2006).
53. Martin, A. & Reed, R. D. *Wingless* and *aristaless2* define a developmental ground plan for



moth and butterfly wing pattern evolution. *Mol. Biol. Evol.* **27**, 2864–2878 (2010).

## Tables

**Table 1:** Embryo injection conditions and success rates for guide RNA injections targeting the two exons of *Dll*.

| Exon             | Cas9 protein (ng/ $\mu$ l) | sgRNA (ng/ $\mu$ l) | Eggs injected | Time of injection (min AEL) | Eggs hatched | Surviving adults | % Survival |
|------------------|----------------------------|---------------------|---------------|-----------------------------|--------------|------------------|------------|
| Exon 2 (Sg1)     | 600                        | 300                 | 823           | 90                          | 100          | 72               | 8.74       |
| Exon 2 (Sg2)     | 600                        | 300                 | 900           | 90                          | 152          | 54               | 6.0        |
| Exon 3 (Batch 1) | 600                        | 300                 | 404           | 240                         | 20           | 10               | 2.4        |
| Exon 3 (Batch 2) | 300                        | 150                 | 486           | 60                          | 65           | 43               | 8.8        |
| Exon 3 (Batch 3) | 300                        | 150                 | 85            | 90                          | 17           | 10               | 11.1       |

**Table 2:** Overview of the mutant phenotypes observed in animals injected with *Dll* guide RNAs. Number of individuals displaying aberrations are reported. Total number of different eyespots carrying distortions are reported in brackets.

| Exon 2 | # Individuals examined | Incomplete eclosion | Margin disruption | Pigmentation disruptions | Split eyespots | Ectopic eyespots | Comet eyespots | Reduced eyespots | Missing eyespots | Leg/Antenna phenotypes |
|--------|------------------------|---------------------|-------------------|--------------------------|----------------|------------------|----------------|------------------|------------------|------------------------|
| Sg1    | 72                     | 6                   | 3                 | 4                        | 5 (5)          | 3 (6)            | 2(2)           | 1 (1)            | 3 (7)            | 11                     |
| Sg2    | 54                     | 6                   | 3                 | 8                        | 3 (2)          | 3 (3)            | 1(1)           | 2 (2)            | 3 (13)           | 6                      |

| Exon 3  | # Individuals examined | Incomplete eclosion | Margin disruption | Pigmentation disruptions | Split eyespots | Ectopic eyespots | Comet eyespots | Reduced eyespots | Missing eyespots | Leg/Antenna phenotypes |
|---------|------------------------|---------------------|-------------------|--------------------------|----------------|------------------|----------------|------------------|------------------|------------------------|
| Sg3 (1) | 10                     | 0                   | 0                 | 0                        | 0              | 0                | 0              | 0                | 0                | 1                      |
| Sg3 (2) | 43                     | 11                  | 10                | 25                       | 8 (12)         | 0                | 0              | 0                | 2 (3)            | 35                     |
| Sg3 (3) | 10                     | 3                   | 4                 | 6                        | 3 (5)          | 0                | 0              | 0                | 2 (3)            | 6                      |

\*These results are based on easily visible phenotypes and are likely an underestimation particularly from individuals that partially or fully eclosed but with highly crumpled and folded wings making it difficult to evaluate the extent of the mutations.
